# Supplementary material
Source: Springer Nature journal article supplement (https://www.springermedizin.de/resource/supplementary/12885_2013_4534_MOESM4_ESM.pdf/9466644)
Supplement: MOESM4 [file 9466644]

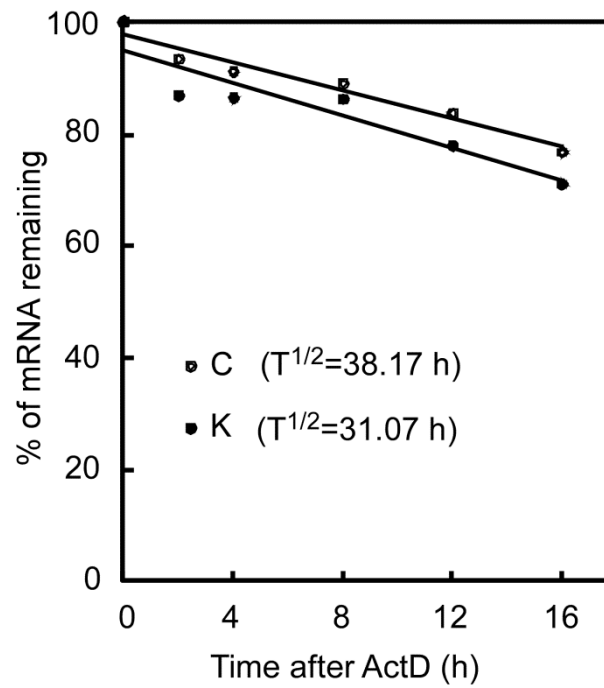

**Figure S1** Effect of hnRNP K knockdown on the half-life of MMP12 mRNA. The levels of MMP12 mRNA in NPC-TW02 cells transfected with control siRNA (C) or hnRNP K siRNA (K) for 48 h were measured following treatment with actinomycin D for 2, 4, 8, 12 and 16 h.
